# Supplementary material
Source: Springer Nature journal article supplement (https://www.springermedizin.de/resource/supplementary/12931_2013_1595_MOESM5_ESM.pdf/10243340)

A

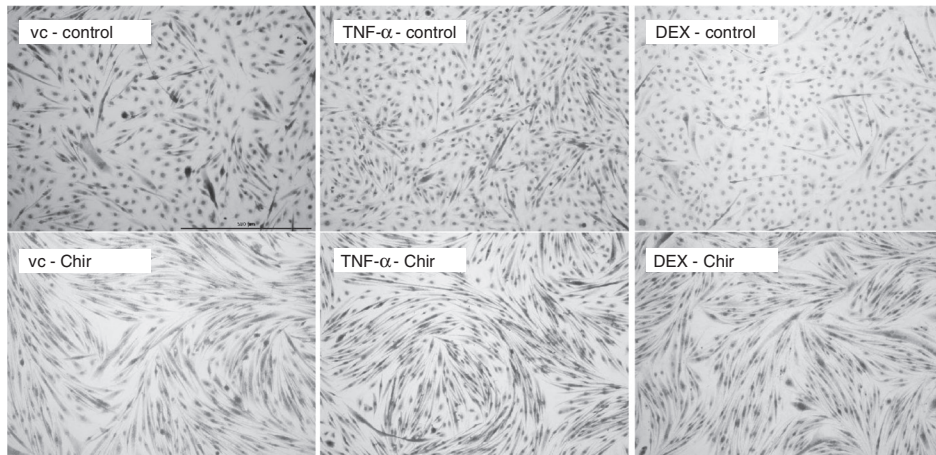

B

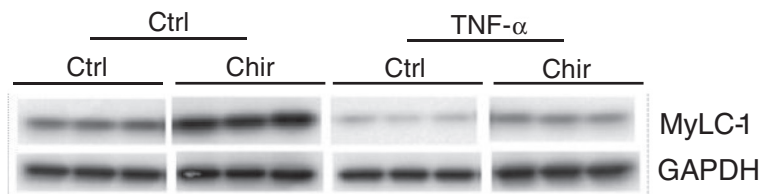

MyLC-1/GAPDH

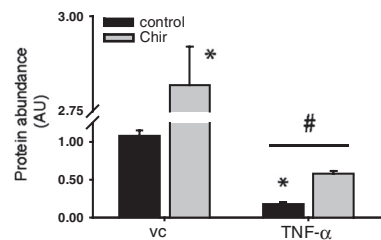

C

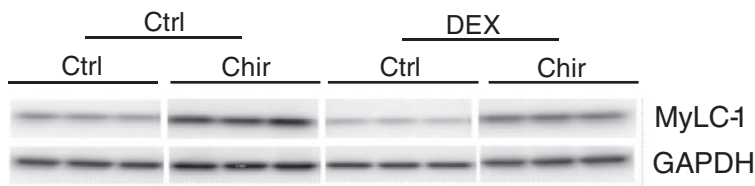

MyLC-1/GAPDH

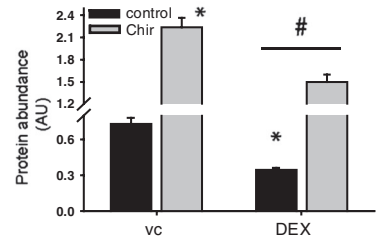

Supplement: MOESM5 [file 10243340]
